# Supplementary material for: Elimination of the geomagnetic field stimulates the proliferation of mouse neural progenitor and stem cells
Source: PubMed Central journal article supplement (PMC5003790; doi:10.1007/s13238-016-0300-7), 2016-08-03
Supplement: 13238_2016_300_MOESM1_ESM.pdf [file 13238_2016_300_MOESM1_ESM.pdf]

# **Elimination of the Geomagnetic Field Stimulates the Proliferation of Mouse Neural Progenitor and Stem Cells**

**Jing-Peng Fu<sup>1,3,†</sup>, Wei-Chuan Mo<sup>12,†</sup>, Ying Liu<sup>1,3,\*</sup>, Perry F. Bartlett<sup>2</sup>, and Rong-Qiao He<sup>1,3,4,\*</sup>**

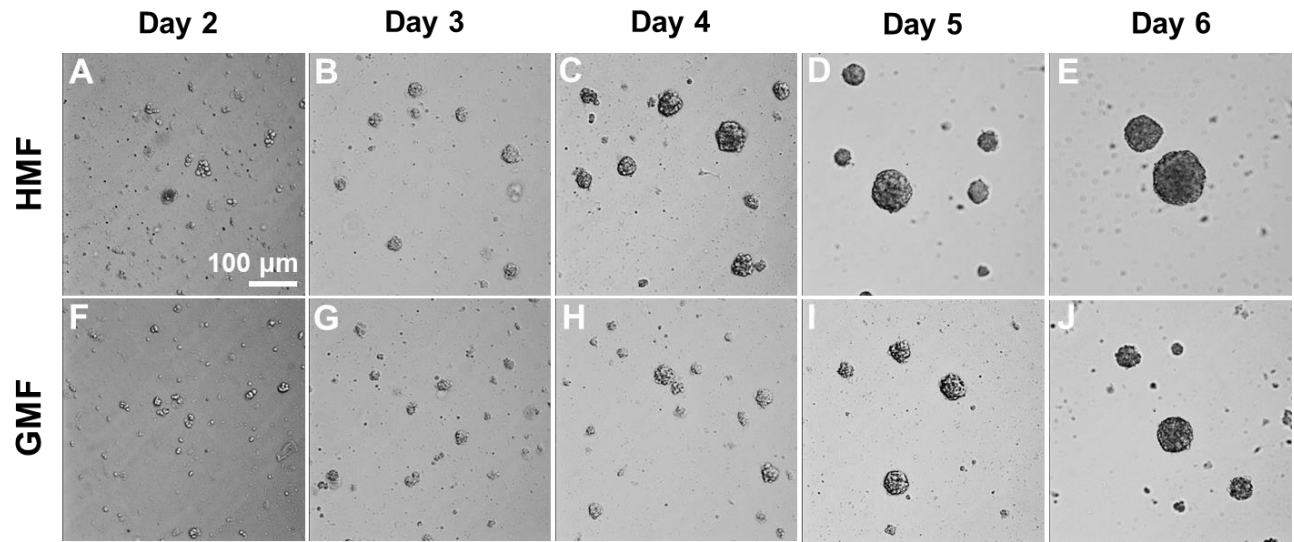

**Supplementary Figure S1.** Representative images of NSs from day 2 to day 6 cultures. **A–E:** HMF-exposed NSs. **F–J:** GMF-control NSs. The morphologies of the NSs exposed to the HMF were similar to those exposed to the GMF but the size of the HMF-exposed NSs appeared to be larger.

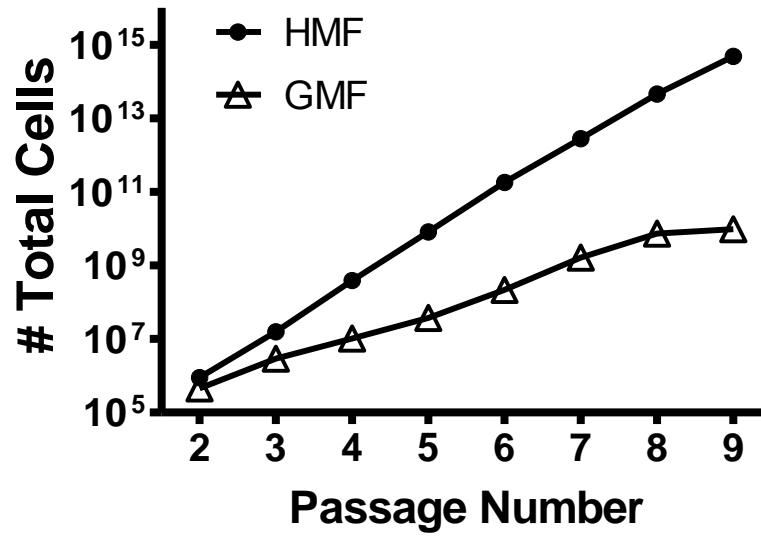

**Supplementary Fig. S2.** Large NSs (diameter > 150  $\mu\text{m}$ ) from the HMF-exposed or GMF control primary cultures could be continuously passaged for 9 passages from an independent experiment.

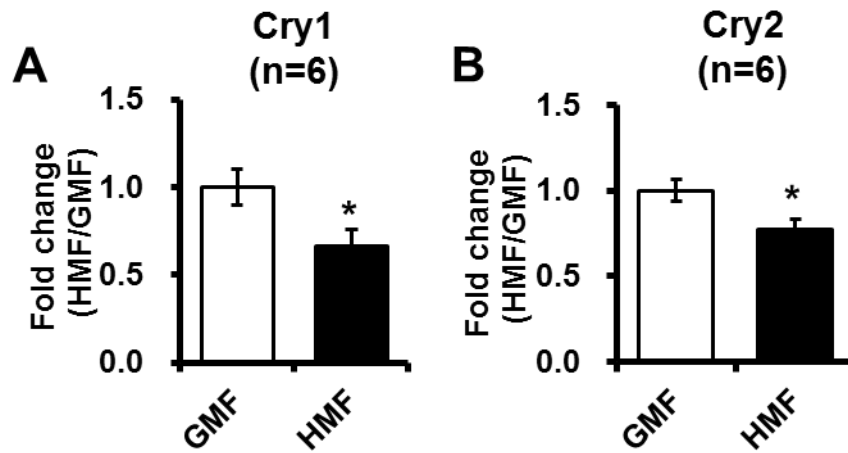

**Supplementary Figure S3.** Expression of the magnetoreceptor genes *Cry1* and *Cry2* at the mRNA level, measured using qPCR. After 7 days exposure in the HMF condition, both *Cry1* and *Cry2* were down-regulated. n is the number of animals from three independent experiments. Data are shown as mean  $\pm$  SEM. p values were calculated using a one-way ANOVA for mean comparisons. \*p<0.05.

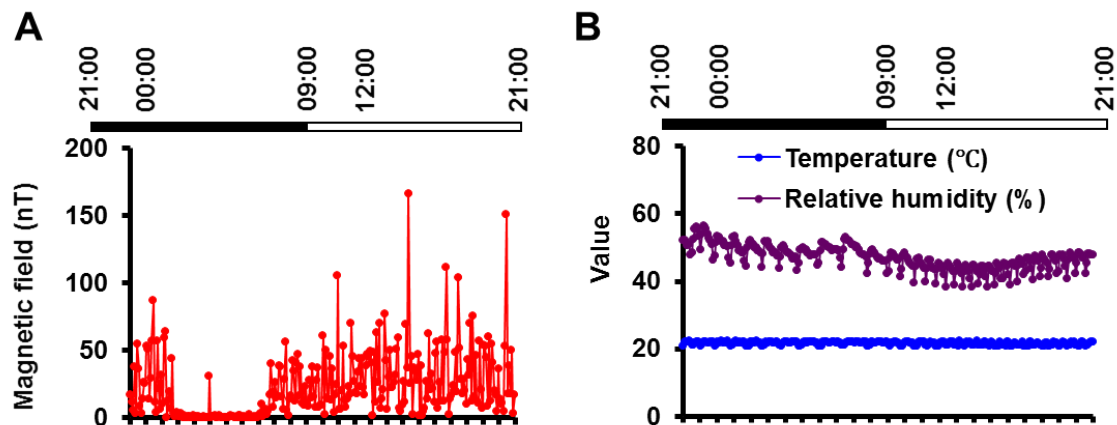

**Supplementary Figure S4.** A representative daily records of the experimental environment. **A:** The daily fluctuation of the residual magnetic field at the center of the HCS at 5 min intervals. **B:** The daily record of the relative humidity and temperature in the experimental room at 5 min intervals.

**Supplementary Table S1.** Magnetic field conditions for animal assay (Mo et al. 2016) (Unit:  $\mu\text{T}$ ).

|                                       | <b> B </b>    | <b>Frequency (Hz)</b> | <b> B<sub>x</sub> </b> | <b> B<sub>y</sub> </b> | <b> B<sub>z</sub> </b> |
|---------------------------------------|---------------|-----------------------|------------------------|------------------------|------------------------|
| <b>The static magnetic field</b>      |               |                       |                        |                        |                        |
| HMF <sub>center</sub>                 | 0.029 ± 0.029 | /                     | 0.009 ± 0.018          | 0.007 ± 0.010          | 0.023 ± 0.025          |
| HMF <sub>avreage</sub>                | 0.55 ± 0.30   | /                     | 0.22 ± 0.16            | 0.37 ± 0.29            | 0.22 ± 0.22            |
| GMF <sub>center</sub>                 | 46.3 ± 1.24   | /                     | 25.8 ± 1.29            | 0.85 ± 0.56            | 38.5 ± 0.64            |
| GMF <sub>average</sub>                | 49.88 ± 1.82  | /                     | 30.62 ± 3.94           | 4.51 ± 2.38            | 38.85 ± 1.75           |
| <b>The alternating magnetic field</b> |               |                       |                        |                        |                        |
| HMF <sub>center</sub>                 | 11.8 ± 1.3    | 50                    | /                      | /                      | /                      |
| GMF <sub>center</sub>                 | 11.3 ± 0.5    | 50                    | /                      | /                      | /                      |
| GMF                                   | 13.6 ± 0.6    | 50                    | /                      | /                      | /                      |

Data are shown as mean ± SD from three measurements. |B<sub>x</sub>|, component of |B| at the direction from South to North; |B<sub>y</sub>|, from East to West; |B<sub>z</sub>|, vertically downward. HMF<sub>center</sub>, residue magnetic field at the center of the HCS under “zero” mode; HMF<sub>avreage</sub>, average magnetic field of the central plane of the HCS at “zero” mode; GMF<sub>center</sub>, GMF at the center of the HCS when the power supplies were turned off; GMF<sub>average</sub>/GMF, average GMF on the control table with HCS under “zero” mode.

**Supplementary table S2.** The primers used for qPCR assay.

| <b>Gene</b>                 | <b>primer</b> | <b>Sequence (5' to 3')</b> | <b>T<sub>m</sub> (°C)</b> | <b>length (bp)</b> |
|-----------------------------|---------------|----------------------------|---------------------------|--------------------|
| Tubulin 5 $\alpha$ (Tubb5)  | forward       | TCACTGTGCCTGAACTTACC       | 58                        | 318                |
|                             | reverse       | GGAACATAGCCGTAAACTGC       |                           |                    |
| Gapdh                       | forward       | AGGTCGGTGTGAACGGATTTG      | 58                        | 123                |
|                             | reverse       | TGTAGACCATGTAGTTGAGGTCA    |                           |                    |
| Nestin                      | forward       | CCCACCTATGTCTGAGGCTC       | 58                        | 166                |
|                             | reverse       | GGGCTAAGGAGGTTGGATCAT      |                           |                    |
| Sox2                        | forward       | GCGGAGTGGAAACTTTTGTCC      | 62                        | 157                |
|                             | reverse       | CGGGAAGCGTGTACTTATCCTT     |                           |                    |
| Gfap                        | forward       | CCCTGGCTCGTGTGGATTT        | 60                        | 238                |
|                             | reverse       | GACCGATACCACTCCTCTGTC      |                           |                    |
| $\beta$ III-tubulin (Tubb3) | forward       | TAGACCCCAGCGGCAACTAT       | 60                        | 127                |
|                             | reverse       | GTTCCAGGTTCCAAGTCCACC      |                           |                    |
| Neurod1                     | forward       | GCAGCTCTGGAGCCCTTCTT       | 58                        | 190                |
|                             | reverse       | GCGGCACCGGAAGAGAAGAT       |                           |                    |
| Cry1                        | forward       | CAGACTCTCGTCAGCAAGATG      | 62                        | 204                |
|                             | reverse       | CAAACGTGTAAGTGCCTCAGT      |                           |                    |
| Cry2                        | forward       | AGCACTTGGAACGGAAGG         | 62                        | 140                |
|                             | reverse       | CAGGCGGTAGTAGAAGAGG        |                           |                    |
